# Supplementary material for: Analytic and Clinical Validation of a Pan-Cancer NGS Liquid Biopsy Test for the Detection of Copy Number Amplifications, Fusions and Exon Skipping Variants
Source: MDPI journal article supplement (doi:10.3390/diagnostics12030729), 2022-03-17
Supplement: s1 [file s1]

## Supplementary Data

Table S1. Reference Cell line information

| Cell line designation   | GeneStrat NGS Test Result      | Comparator Result (NGS or other method)                                         | Cell line citation in literature                |
|-------------------------|--------------------------------|---------------------------------------------------------------------------------|-------------------------------------------------|
| Cell line #1 (CRL-5935) | ALK-fusion detected (EML4-ALK) | Detected by NGS All-in-one Transcriptome based Assay [1]                        | NCI-H2228 [H2228] (ATCC CRL-5935)               |
| Cell line #2 (HTB-178)  | MET exon 14 skipping           | Detected by NGS All-in-one Transcriptome based Assay [1]                        | NCI-H596 [H596]-HTB-178 <sup>TM</sup> (ATCC)    |
| Cell line #3 (KM12)     | TPM3-NTRK1 fusion              | Detected by NGS All-in-one Transcriptome based Assay [1]                        | KM12 (ATCC)                                     |
| Cell line #4 (HCC78)    | SLC34A2-ROS1 fusion            | Detected by Mass Spectrometry Assay [23]                                        | HCC78 (Creative Bio-array)                      |
| Cell line #5 (CRL-5928) | ERBB2/HER2 CNV                 | Detected by NGS and qPCR [24]                                                   | NCI-H2170 [H2170] CRL-5928 <sup>TM</sup> (ATCC) |
| Cell line #6 (HCC-827)  | EGFR amplification             | Detected by NGS and qPCR [24]                                                   | HCC827 CRL-2868 <sup>TM</sup> (ATCC)            |
| Cell line #7 (SK-BR-3)  | ERBB2/HER2 amplification       | (FISH)-based method to determine HER-2 amplification in breast cancer CTCs [25] | SK-BR-3 [SKBR3] HTB-30 <sup>TM</sup> (ATCC)     |
| Cell line #8 (CRL-5909) | MET amplification              | Detected by qPCR [26]                                                           | NCI-H1993 [H1993] (ATCC)                        |

Audetat A. etal.
